# Supplementary material
Source: PubMed Central journal article supplement (PMC5659188)

**A**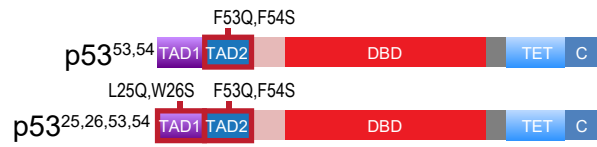**B**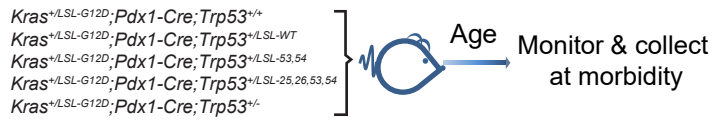**D**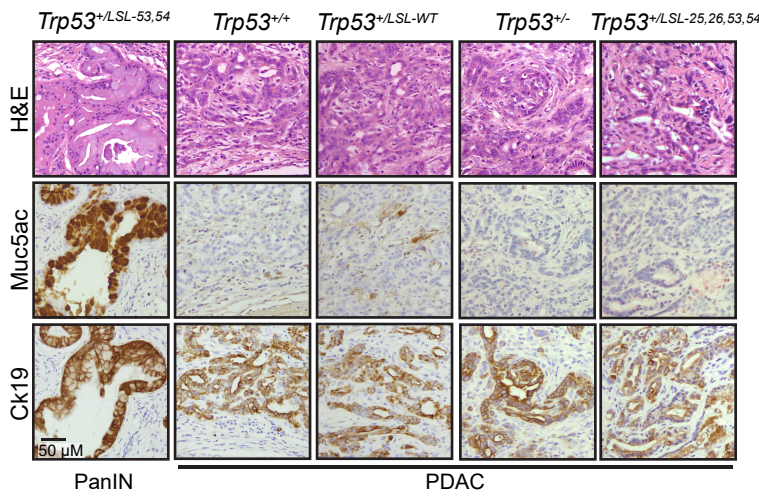**C**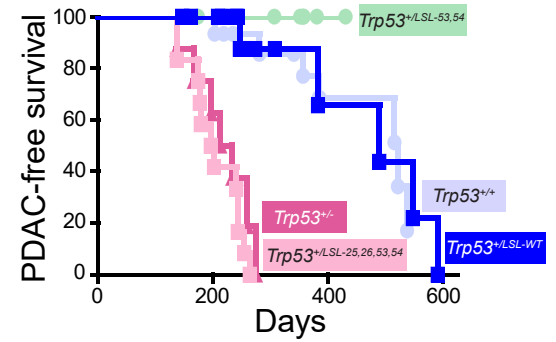**E**

|                                           | PanINs | IPMNs | PDACs | Metastasis |
|-------------------------------------------|--------|-------|-------|------------|
| <i>Trp53<sup>+/-LSL-53,54</sup></i>       | 80%    | -     | -     | -          |
| <i>Trp53<sup>+/-</sup></i>                | 37.5%  | 6.2%  | 43.8% | 18.2%      |
| <i>Trp53<sup>+/-LSL-WT</sup></i>          | 28.6%  | -     | 35.7% | 25%        |
| <i>Trp53<sup>+/-</sup></i>                | 12.5%  | -     | 87.5% | 50%        |
| <i>Trp53<sup>+/-LSL-25,26,53,54</sup></i> | -      | -     | 100%  | 57.1%      |

**F**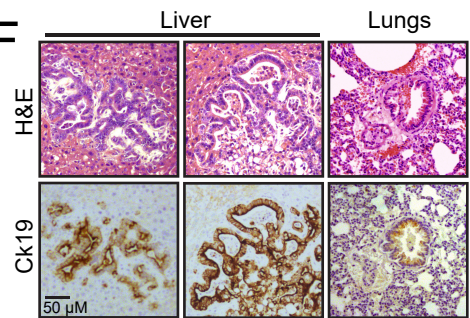

Supplement: NIHMS907136-supplement-1.pdf [file NIHMS907136-supplement-1.pdf]
