# Supplementary material
Source: PubMed Central journal article supplement (PMC5659188)
Supplement: NIHMS907136-supplement-2.pdf [file NIHMS907136-supplement-2.pdf]

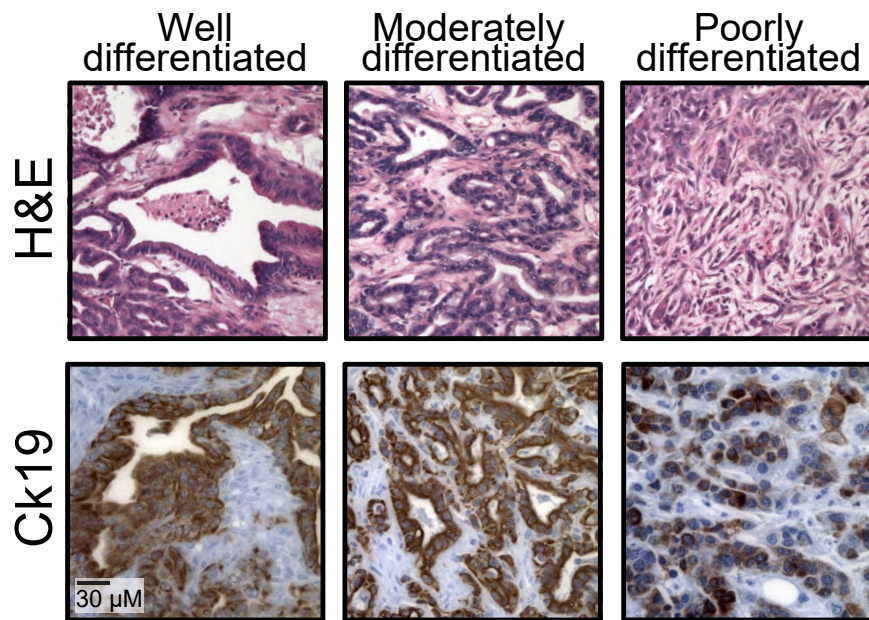

**Figure S1, related to Figure 1. Differentiation states in mouse PDAC**

Representative H&E and Ck19 immunostaining images showing pancreatic cancers of various differentiation states in 3 different *Kras*<sup>+/*L*SL-G12D</sup>, *Pdx1-Cre*, *p53*<sup>+/*L*SL-25,26,53,54</sup> mice. The scale bar applies to all images in the panel.

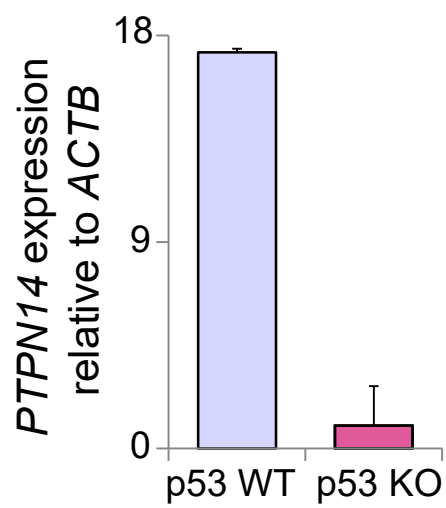

**Figure S2, related to Figure 3. Ptpn14 expression is p53-dependent in human colorectal cancer cells**

qRT-PCR analysis of *PTPN14* expression in doxorubicin-treated (0.2  $\mu\text{g}/\text{mL}$ ) human HCT116 colorectal cancer cells with and without p53. The cells were collected 24 hr post-treatment. *PTPN14* expression is shown relative to *ACTB*.

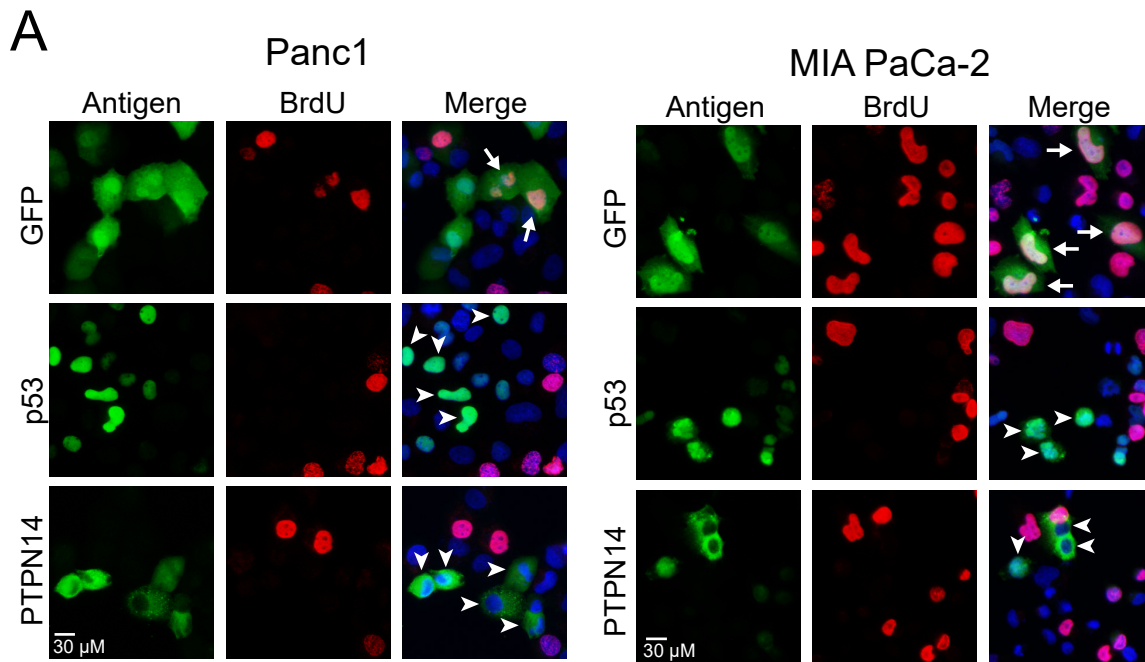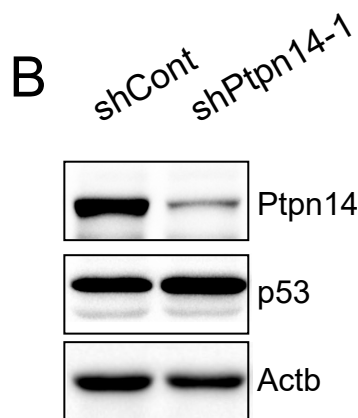

**Figure S3, related to Figure 4. Ptpn14 inhibits cell proliferation in human pancreatic cancer cells**

(A) The effect of HA-GFP, HA-Ptpn14 or HA-p53 expression on cell cycle progression in PANC-1 and MIA PaCa-2 human PDAC cells was examined by BrdU immunostaining. BrdU-positivity of cells expressing each antigen (detected by green fluorescence or HA immunofluorescence) was assessed. Representative images with arrows pointing to BrdU<sup>+</sup> cells and arrowheads pointing to BrdU<sup>-</sup> cells are depicted. The scale bar applies to all images in the panel. (B) Western blot examining Ptpn14 levels in p53-over-expressing PDAC cells from *Kras<sup>+LSL-G12D</sup>;Pdx1-Cre;Trp53<sup>fl/fl</sup>* (KPC) mice which were also transduced with either shControl or shPtpn14-1. The cells were used for BrdU incorporation experiments (quantification shown in Figure 4E). Actb is a loading control.

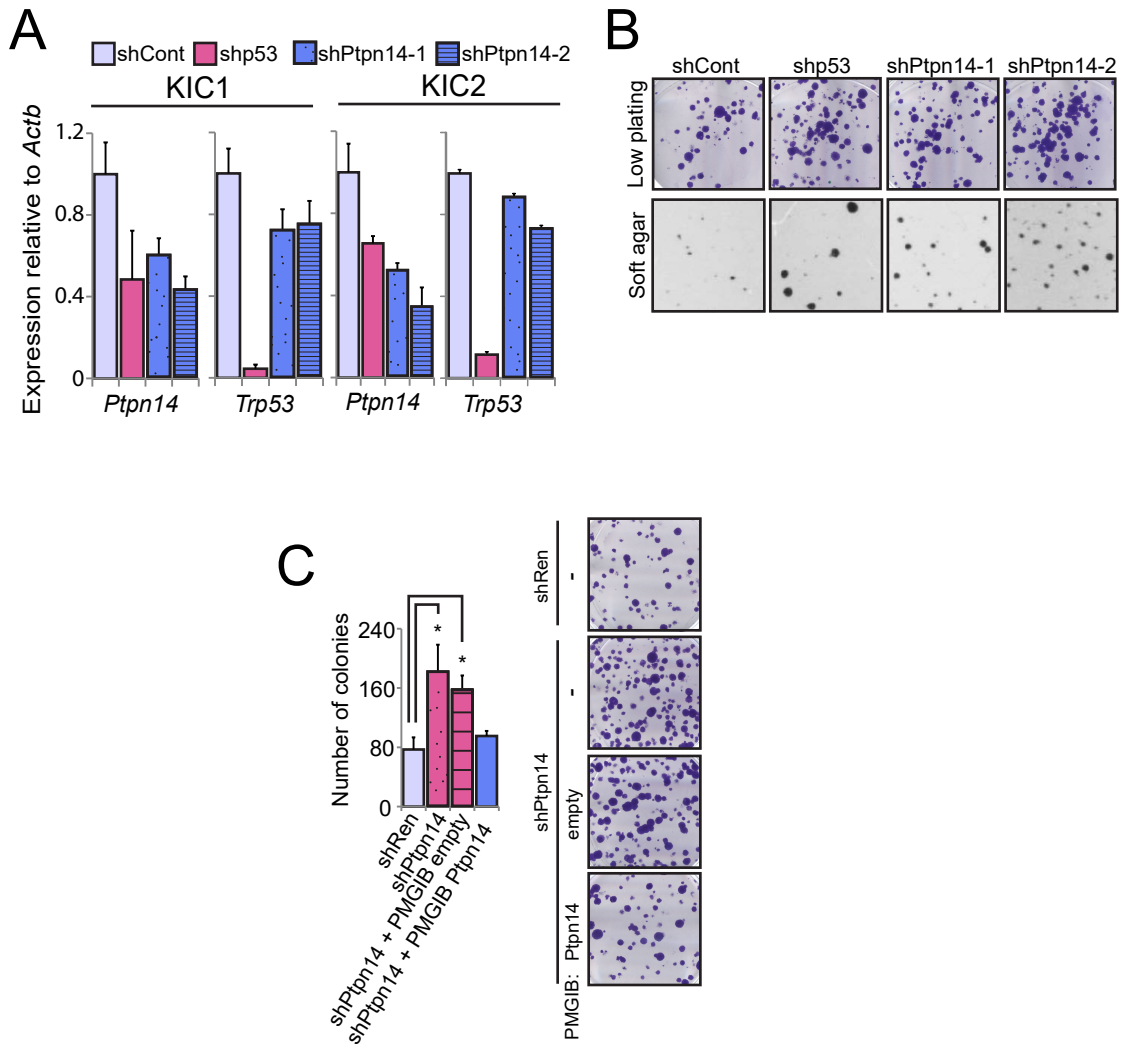

**Figure S4, related to Figure 5. Ptpn14 displays tumor suppressor activity**

(A) qRT-PCR to examine knockdown of *Ptpn14* in two different lines of PDAC cells from *Kras<sup>LSL-G12D/+</sup>;Pdx1-Cre;Cdkn2a<sup>fl/fl</sup>* (KIC) mice after infection with a luciferase control shRNA or either of two *Ptpn14* shRNAs (n=3). Knockdown of *Trp53* with p53 shRNA is also shown. (B) (Upper) Representative images of low plating experiments in a second KIC cell line after introduction of control shRNA, p53 shRNA, *Ptpn14* shRNA-1 or *Ptpn14* shRNA-2 (n=3, quantification shown in Figure 5B). (Lower) Representative images of soft agar experiment in a second KIC cell line after introduction of luciferase control shRNA, p53 shRNA, *Ptpn14* shRNA-1 or *Ptpn14* shRNA-2 (n=3, quantification shown in Figure 5C). (C) (Left) Low plating experiment quantification, showing the average colony number  $\pm$  SD after introduction of luciferase control shRNA, p53 shRNA, *Ptpn14* shRNA-1 or *Ptpn14* shRNA-2, and rescue with a PMGIB-*Ptpn14* overexpression construct. The experiments were performed in two PDAC KIC cell lines (n=2). (Right) Representative images show the crystal violet-stained colonies 2 weeks after seeding. \*  $p \leq 0.05$ ; \*\*  $p \leq 0.001$ , based on the two-tailed unpaired Student's t-test.

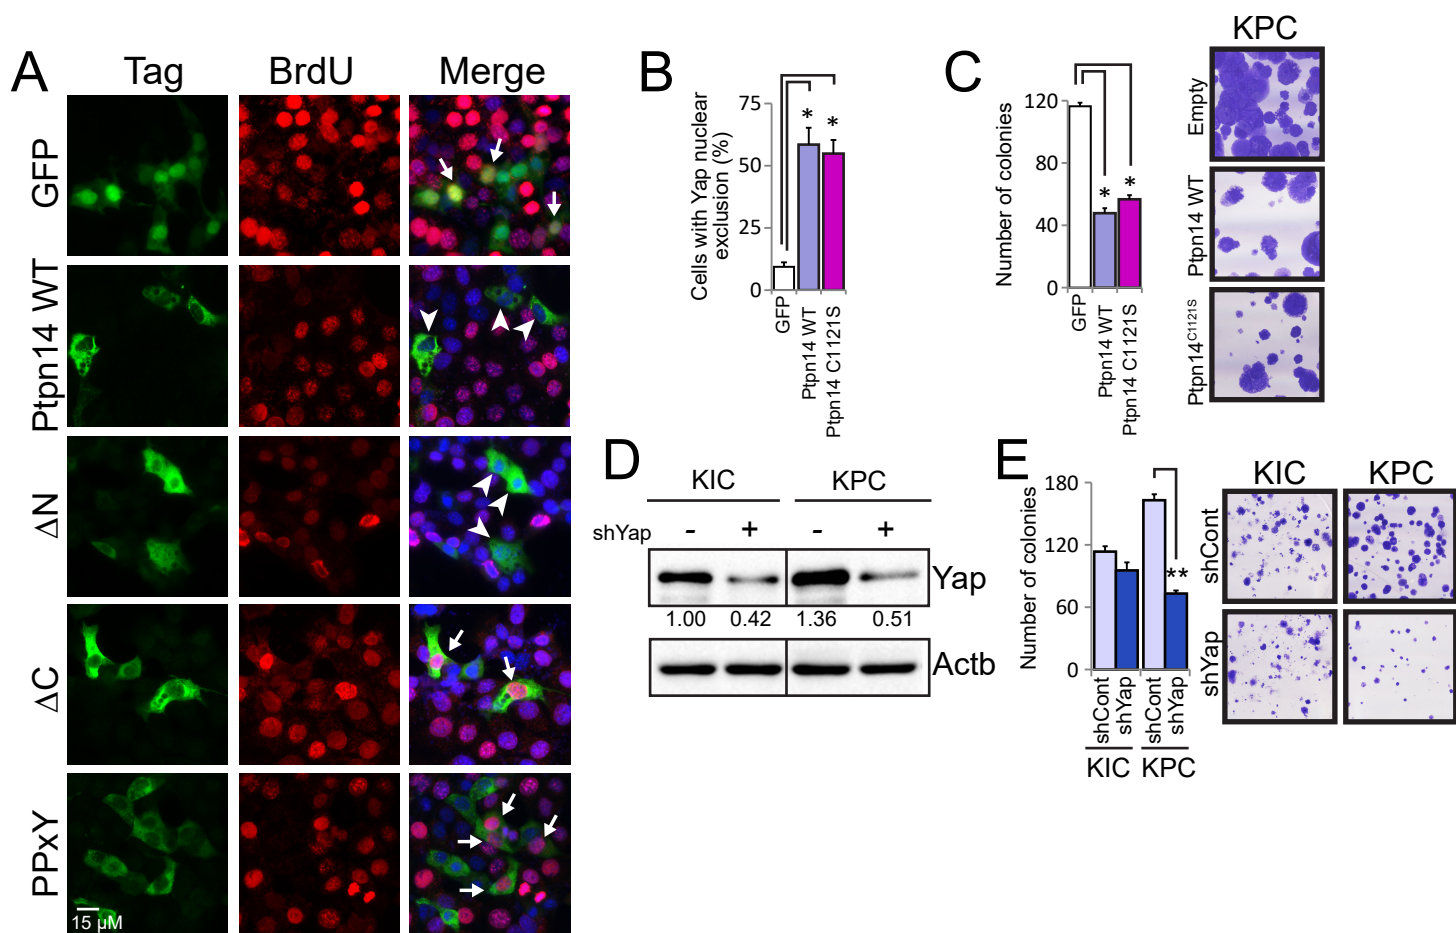

**Figure S5, related to Figure 6. Ptpn14 inhibits proliferation through effects on Yap activity**

(A) HA-GFP or different Ptpn14 variants were expressed in *Kras<sup>+/LSL-G12D</sup>;Pdx1-Cre;Trp53<sup>fl/fl</sup>* (KPC) mouse PDAC cells and BrdU-positivity of cells expressing each antigen (detected by green fluorescence or V5/HA immunofluorescence) was assessed. Representative images with arrows pointing to dividing (BrdU<sup>+</sup>) cells and arrowheads pointing to arresting (BrdU<sup>-</sup>) cells are depicted. The scale bar applies to all images in the panel. (B) Effects of HA-Ptpn14 or the phosphatase mutant HA-Ptpn14-C1121S expression on Yap localization in KPC cells, compared to HA-GFP. The graph shows the percentage of cells with Yap nuclear exclusion +/- SD (n=3). At least 50 cells were analyzed per experiment. (C) Colony forming ability of KPC cells overexpressing HA-Ptpn14 or the phosphatase mutant HA-Ptpn14-C1121S. (Left) Low plating experiment quantification, showing the average colony number ± SD (n=3). (Right) Representative images show the crystal violet-stained colonies 2 weeks after seeding. (D) Western blot confirming knockdown of Yap protein in PDAC cells from KIC and KPC cells after introduction of a luciferase control shRNA or a Yap shRNA. Actb is a loading control. (E) Colony forming ability of KIC and KPC cells expressing luciferase control or Yap shRNAs. (Left) Low plating experiment quantification, showing the average colony number ± SD (n=3). (Right) Representative images show the crystal violet-stained colonies 2 weeks after seeding. \* p ≤ 0.05; \*\* p ≤ 0.001, based on the two-tailed unpaired Student's t-test.

---

**Table S1, related to Figure 6.** List of 42 Yap target genes depicted in heatmap on Figure 6G.

---

- 1 *Rgcc*
  - 2 *Tgm2*
  - 3 *Serpine1*
  - 4 *Phgdh*
  - 5 *Ndrp1*
  - 6 *Tnnt2*
  - 7 *Schip1*
  - 8 *Slit2*
  - 9 *Fstl1*
  - 10 *Lhfp*
  - 11 *Axl*
  - 12 *Camk4*
  - 13 *Hexb*
  - 14 *Msn*
  - 15 *Dut*
  - 16 *Itgb5*
  - 17 *Tk1*
  - 18 *Cdk6*
  - 19 *Shcbp1*
  - 20 *Anln*
  - 21 *Sgk1*
  - 22 *Samsn1*
  - 23 *Mdfic*
  - 24 *Shisa4*
  - 25 *Stmn1*
  - 26 *Ccrn4l*
  - 27 *Cdc20*
  - 28 *Cenpf*
  - 29 *Birc5*
  - 30 *Top2a*
  - 31 *Hmmr*
  - 32 *Rpn2*
  - 33 *Mocs2*
  - 34 *Nras*
  - 35 *Siae*
  - 36 *Gas2l3*
  - 37 *Dram2*
  - 38 *Ect2*
  - 39 *Thbs1*
  - 40 *Rhoq*
  - 41 *Msrb3*
  - 42 *Ctgf*
-

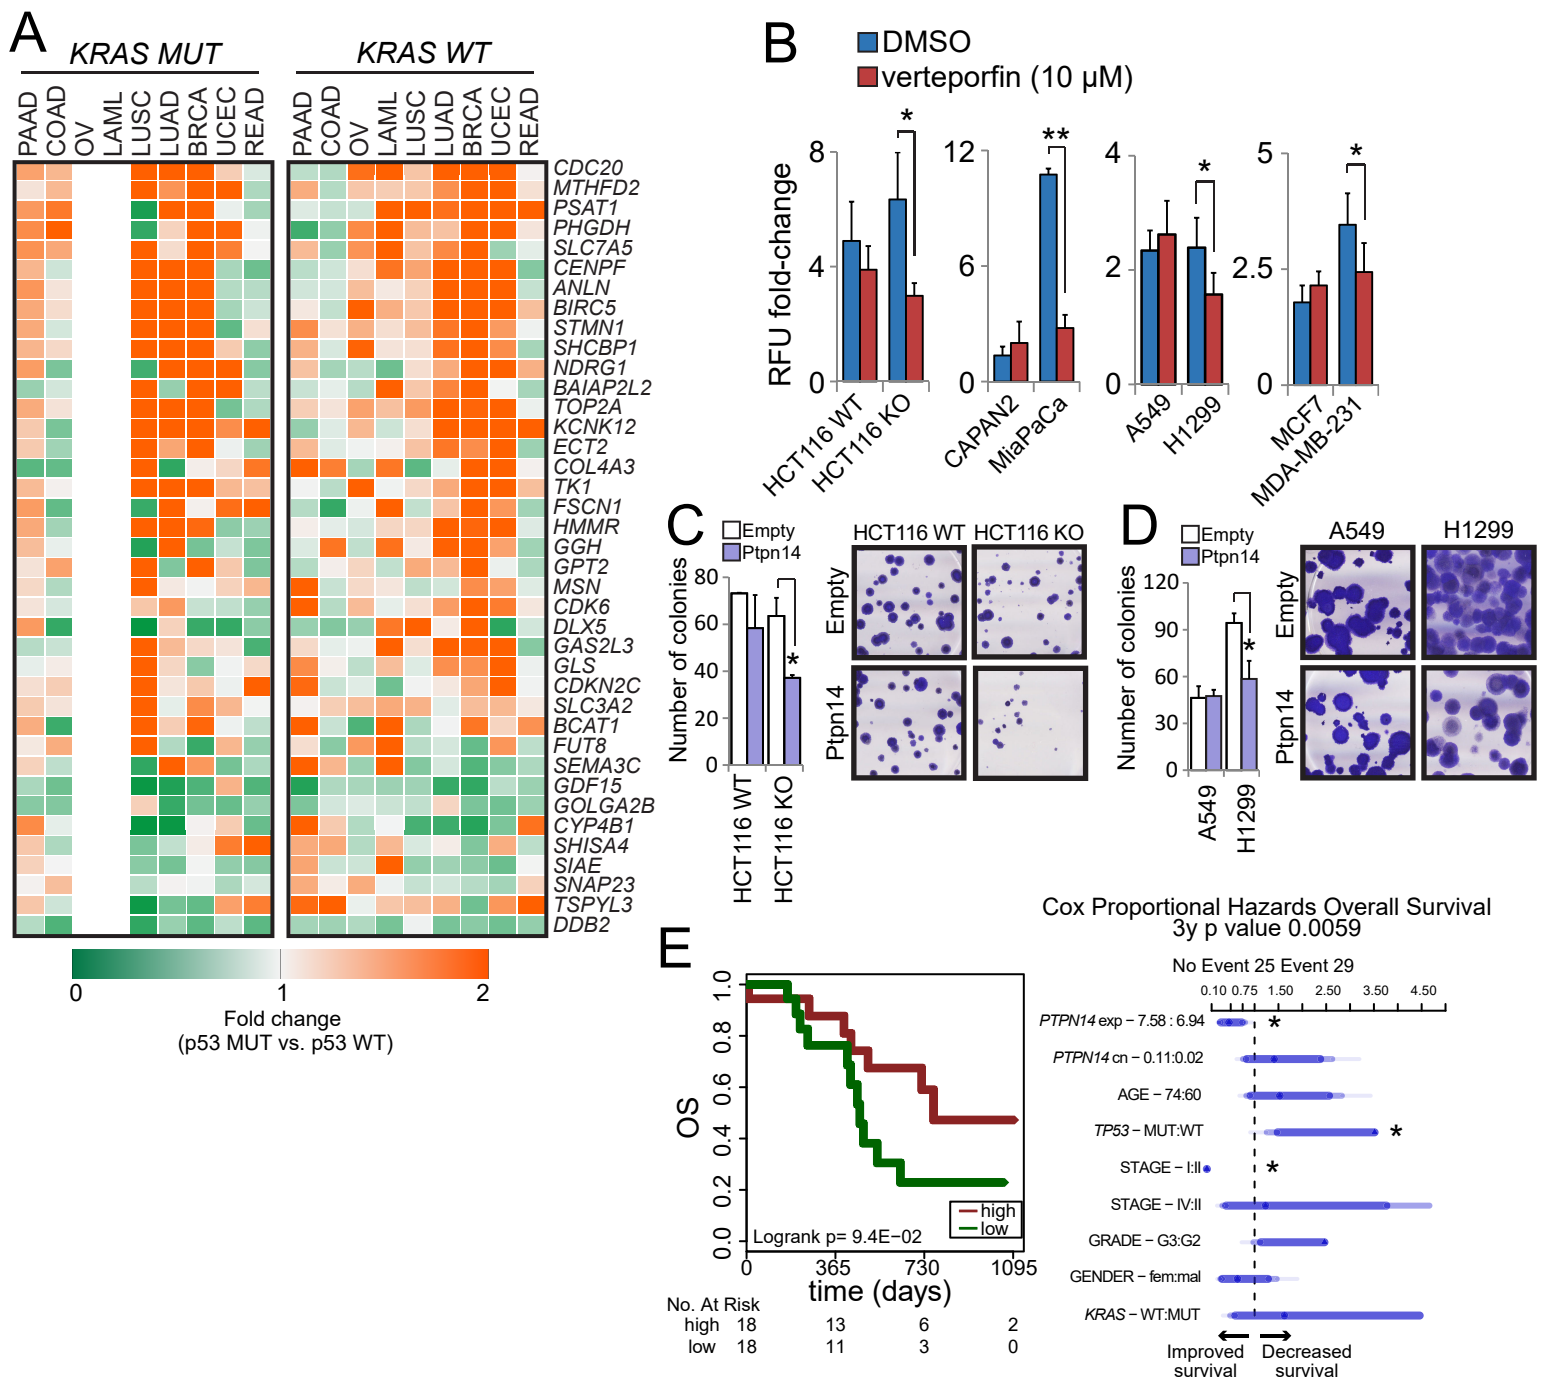

**Figure S6, related to Figure 7. The p53-Ptpn14-Yap tumor suppressive axis is important in human cancer**

(A) Heat map illustrating the fold-change in the expression of Yap-activated genes in tumor samples harboring *TP53* mutations relative to tumors with wild-type *TP53*. For each cancer the samples were further divided into those expressing mutant and wild-type *KRAS* (except OV and LAML, where there are no *KRAS* mutations), to assess the effect of *KRAS* mutations on p53-dependent Yap inhibition. (B) Quantification of viable cells using the Cell Titer-Blue assay in a variety of p53-proficient and deficient human cancer cells treated with DMSO or the Yap inhibitor verteporfin (10  $\mu$ M). Colorectal (HCT116 p53 WT and HCT116 p53 KO), pancreatic (CAPAN2-p53 WT and MIA PaCa-2-p53 MUT), lung (A549-p53 WT and H1299-p53 MUT) and breast (MCF7-p53 WT and MDA-MB-231-p53 MUT) cancer cells were assessed 48 hours after verteporfin treatment. The Relative Fluorescence Units (RFU) reads were normalized based on initial fluorescence and background fluorescence values. (C) Colony formation ability of HCT116 cells proficient or deficient for p53 after introduction of a plasmid expressing HA-Ptpn14. (Left) Low plating experiment quantification, showing the average colony number  $\pm$  SD ( $n=3$ ). (Right) Representative images show the crystal violet-stained colonies 2 weeks after seeding. (D) Colony formation ability of A549 (p53 wild-type) or H1299 (p53 mutant) cells after introduction of a plasmid expressing HA-Ptpn14. (Left) Low plating experiment quantification, showing the average colony number  $\pm$  SD ( $n=2$ ). (Right) Representative images show the Crystal Violet-stained colonies 2 weeks after seeding. (E) Analysis of overall survival of PDAC patients from the International Cancer Genome Consortium (ICGC) pancreatic cancer project (Code: PACA-AU) divided by *PTPN14* expression levels. (Left) Kaplan-Meier analysis for overall survival of patients with tumors manifesting either high or low expression values of *PTPN14*. Survival analysis was based on those individuals without *PTPN14* copy number variations. High value correspond to the high tercile of the adjusted expression value, and low value to lowest tercile. (Right) Hazard plot of Cox Proportional Hazards for the association between overall survival and *PTPN14* expression levels, CN, grade, age, stage, gender and *KRAS* and *TP53* mutation status. Asterisks indicate the factors that significantly affect overall survival.



**Table S2, related to Figure 7.** Sample size for each cohort and breakdown of *TP53* mutant vs *TP53* wild-type cases used to determine changes in gene expression of Yap-induced genes, in Figure 7C.

| <b>Cancer type</b>                    | <b>Dataset</b> | <b>Total</b> | <b>p53 wild-type</b> | <b>p53 mutant</b> |
|---------------------------------------|----------------|--------------|----------------------|-------------------|
| Rectum adenocarcinoma                 | READ           | 35           | 14                   | 21                |
| Colon adenocarcinoma                  | COAD           | 65           | 31                   | 34                |
| Ovarian serous cystadenocarcinoma     | OV             | 162          | 7                    | 155               |
| Lung squamous cell carcinoma          | LUSC           | 177          | 36                   | 141               |
| Lung adenocarcinoma                   | LUAD           | 163          | 82                   | 81                |
| Breast invasive carcinoma             | BRCA           | 751          | 498                  | 253               |
| Bladder urothelial carcinoma          | BLCA           | 95           | 47                   | 48                |
| Kidney renal clear cell carcinoma     | KIRC           | 391          | 383                  | 8                 |
| Head and Neck squamous cell carcinoma | HNSC           | 271          | 75                   | 196               |
| Glioblastoma multiforme               | GBM            | 142          | 97                   | 45                |
| Uterine Corpus Endometrial Carcinoma  | UCEC           | 239          | 171                  | 68                |
| Acute Myeloid Leukemia                | LAML           | 169          | 156                  | 13                |
| Pancreatic adenocarcinoma             | PAAD           | 121          | 40                   | 81                |



**Table S3, related to Figure 7.** Combined statistics of Yap-induced genes, comparing expression levels in *TP53* mutant and *TP53* wild-type samples across different types of cancer, for each gene shown in Figure 7C.

| symbol          | entrez | hazard ratio | coef        | se         | lower      | upper      | p value  |
|-----------------|--------|--------------|-------------|------------|------------|------------|----------|
| <i>CDC20</i>    | 991    | 2.094023592  | 0.739087379 | 0.04490542 | 1.91759993 | 2.28667864 | 7.60E-70 |
| <i>DDB2</i>     | 1643   | 0.576812072  | -0.55023876 | 0.02836685 | 0.54561768 | 0.60978993 | 1.96E-62 |
| <i>MTHFD2</i>   | 10797  | 1.618500652  | 0.481500197 | 0.03288903 | 1.51746151 | 1.72626742 | 1.68E-48 |
| <i>PSAT1</i>    | 29968  | 2.108227848  | 0.745847712 | 0.06237312 | 1.86562972 | 2.38237235 | 7.73E-47 |
| <i>PHGDH</i>    | 26227  | 2.130141535  | 0.756188426 | 0.05882446 | 1.89817823 | 2.39045148 | 4.40E-46 |
| <i>SLC7A5</i>   | 8140   | 1.87768378   | 0.630038986 | 0.0558943  | 1.68284896 | 2.09507594 | 1.99E-45 |
| <i>CENPF</i>    | 1063   | 1.663376468  | 0.508849554 | 0.04550483 | 1.5214468  | 1.81854619 | 1.50E-44 |
| <i>ANLN</i>     | 54443  | 1.760670926  | 0.565694945 | 0.045798   | 1.6095144  | 1.92602322 | 8.85E-44 |
| <i>BIRC5</i>    | 332    | 1.839817143  | 0.609666188 | 0.04843366 | 1.67320001 | 2.02302599 | 9.34E-43 |
| <i>STMN1</i>    | 3925   | 1.571826328  | 0.452238209 | 0.03977591 | 1.45394254 | 1.69926798 | 1.06E-40 |
| <i>SHCBP1</i>   | 79801  | 1.530228936  | 0.425417356 | 0.03898074 | 1.4176726  | 1.6517217  | 1.13E-37 |
| <i>SEMA3C</i>   | 10512  | 0.743242314  | -0.29673316 | 0.05903436 | 0.66203399 | 0.83441205 | 6.07E-35 |
| <i>NDRG1</i>    | 10397  | 1.533696421  | 0.427680783 | 0.05142128 | 1.38665855 | 1.69632583 | 4.81E-34 |
| <i>FUT8</i>     | 2530   | 0.798620745  | -0.22486911 | 0.03710925 | 0.74259691 | 0.85887119 | 1.21E-31 |
| <i>BAIAP2L2</i> | 80115  | 1.7685119    | 0.570138459 | 0.06797384 | 1.54792012 | 2.02053989 | 7.64E-30 |
| <i>GDF15</i>    | 9518   | 0.389564551  | -0.9427257  | 0.07839485 | 0.33407933 | 0.45426497 | 3.89E-29 |
| <i>TOP2A</i>    | 7153   | 1.476531596  | 0.389695821 | 0.04657222 | 1.34772226 | 1.61765196 | 4.43E-25 |
| <i>GOLGA2B</i>  | 55592  | 0.585077465  | -0.53601102 | 0.04864919 | 0.53186707 | 0.64361126 | 1.21E-24 |
| <i>KCNK12</i>   | 56660  | 1.841883996  | 0.610788959 | 0.0583998  | 1.64267736 | 2.06524832 | 2.05E-24 |
| <i>ECT2</i>     | 1894   | 1.429318723  | 0.357197913 | 0.03844948 | 1.32556438 | 1.5411941  | 2.26E-24 |
| <i>COL4A3</i>   | 1285   | 1.518993871  | 0.418048189 | 0.07997103 | 1.29862738 | 1.77675476 | 2.99E-24 |
| <i>TK1</i>      | 7083   | 1.508696074  | 0.411245751 | 0.04213628 | 1.38910569 | 1.63858219 | 5.34E-24 |
| <i>CYP4B1</i>   | 1580   | 0.726034251  | -0.32015809 | 0.06455541 | 0.6397458  | 0.82396123 | 2.24E-23 |
| <i>FSCN1</i>    | 6624   | 1.56748183   | 0.449470402 | 0.04746944 | 1.42822443 | 1.72031736 | 2.33E-23 |
| <i>HMMR</i>     | 3161   | 1.493797566  | 0.40132158  | 0.04728785 | 1.36157088 | 1.63886522 | 4.79E-23 |
| <i>SHISA4</i>   | 149345 | 0.856474549  | -0.15493068 | 0.0416797  | 0.78929007 | 0.92937778 | 2.53E-22 |
| <i>GGH</i>      | 8836   | 1.407337757  | 0.341699804 | 0.0478529  | 1.28134441 | 1.54571991 | 6.28E-22 |
| <i>SIAE</i>     | 54414  | 0.686035571  | -0.3768258  | 0.03787608 | 0.63695164 | 0.73890195 | 1.77E-21 |
| <i>GPT2</i>     | 84706  | 1.440034945  | 0.364667381 | 0.04333849 | 1.32276667 | 1.56769949 | 3.06E-21 |
| <i>MSN</i>      | 4478   | 1.260445113  | 0.231464923 | 0.03306569 | 1.18134942 | 1.34483656 | 6.06E-21 |
| <i>SNAP23</i>   | 8773   | 0.855321243  | -0.15627816 | 0.02080519 | 0.82114499 | 0.89091991 | 7.57E-21 |
| <i>CDK6</i>     | 1021   | 1.51828401   | 0.417580756 | 0.05121109 | 1.37328937 | 1.67858748 | 2.76E-19 |
| <i>DLX5</i>     | 1749   | 1.615782962  | 0.479819645 | 0.07385031 | 1.39804621 | 1.86743082 | 4.83E-19 |
| <i>GAS2L3</i>   | 283431 | 1.369986422  | 0.314800829 | 0.05232951 | 1.23644074 | 1.51795613 | 5.26E-19 |
| <i>TSPYL3</i>   | 128854 | 0.782662148  | -0.24505416 | 0.0494982  | 0.71029929 | 0.86239708 | 1.38E-17 |
| <i>GLS</i>      | 2744   | 1.286809474  | 0.252165879 | 0.03501741 | 1.20145464 | 1.37822817 | 3.53E-17 |
| <i>CDKN2C</i>   | 1031   | 1.235226491  | 0.211254347 | 0.04110371 | 1.13961736 | 1.33885682 | 4.89E-17 |
| <i>SLC3A2</i>   | 6520   | 1.284518259  | 0.250383753 | 0.02741842 | 1.21731137 | 1.35543559 | 8.01E-17 |
| <i>BCAT1</i>    | 586    | 1.524064242  | 0.42138061  | 0.06238223 | 1.34866295 | 1.72227747 | 9.80E-17 |
| <i>C16orf87</i> | 388272 | 1.27163929   | 0.240306847 | 0.02823076 | 1.20318905 | 1.34398371 | 4.10E-16 |
| <i>C17orf58</i> | 284018 | 0.901492104  | -0.103704   | 0.0316528  | 0.8472645  | 0.95919044 | 4.47E-16 |
| <i>ASAP1</i>    | 50807  | 1.332040624  | 0.28671207  | 0.03001045 | 1.25595051 | 1.41274056 | 9.67E-16 |
| <i>CRIM1</i>    | 51232  | 0.881088209  | -0.12659753 | 0.03909926 | 0.81608996 | 0.9512633  | 1.77E-15 |
| <i>XAGE2</i>    | 9502   | 1.095832883  | 0.091514697 | 0.02057801 | 1.052515   | 1.14093358 | 4.03E-15 |
| <i>SCHIP1</i>   | 29970  | 1.395684567  | 0.333385024 | 0.04301163 | 1.28284951 | 1.51844421 | 7.56E-15 |
| <i>SDPR</i>     | 8436   | 0.682062944  | -0.38263333 | 0.06096507 | 0.60524456 | 0.76863121 | 9.04E-15 |
| <i>PRRG1</i>    | 5638   | 1.313755689  | 0.272889974 | 0.04656698 | 1.19915888 | 1.43930386 | 2.03E-14 |
| <i>ATP2C1</i>   | 27032  | 1.129596671  | 0.121860641 | 0.02107155 | 1.08389513 | 1.17722518 | 6.31E-14 |
| <i>GNB4</i>     | 59345  | 1.213455177  | 0.193471809 | 0.04028393 | 1.12133144 | 1.3131474  | 1.25E-13 |
| <i>DLC1</i>     | 10395  | 0.687670249  | -0.37444585 | 0.04617651 | 0.62816642 | 0.75281065 | 1.47E-13 |
| <i>MYC</i>      | 4609   | 1.45750143   | 0.37672362  | 0.04734415 | 1.328341   | 1.5992207  | 2.98E-13 |
| <i>RPN2</i>     | 6185   | 1.187092082  | 0.171506688 | 0.02331236 | 1.13407268 | 1.24259021 | 5.59E-13 |
| <i>TNNT2</i>    | 7139   | 1.18149987   | 0.166784708 | 0.05658898 | 1.05746269 | 1.32008623 | 6.95E-13 |
| <i>PMP22</i>    | 5376   | 0.78023429   | -0.24816103 | 0.0446778  | 0.71481758 | 0.85163763 | 5.64E-12 |
| <i>GKAP1</i>    | 80318  | 0.763050806  | -0.27043066 | 0.03982253 | 0.70575905 | 0.82499336 | 5.69E-12 |
| <i>ITGB5</i>    | 3693   | 0.947058912  | -0.05439398 | 0.03618247 | 0.88222308 | 1.01665962 | 5.96E-12 |

|          |        |             |             |            |            |            |          |
|----------|--------|-------------|-------------|------------|------------|------------|----------|
| ETV5     | 2119   | 1.199160898 | 0.18162206  | 0.04524258 | 1.09740493 | 1.3103521  | 2.24E-11 |
| DUSP1    | 1843   | 0.693222327 | -0.36640451 | 0.05653462 | 0.620512   | 0.7744527  | 2.29E-11 |
| CDIPT    | 10423  | 1.010886152 | 0.010827324 | 0.02093783 | 0.9702417  | 1.05323324 | 3.67E-11 |
| MYO1C    | 4641   | 0.864976094 | -0.14505341 | 0.02714058 | 0.82016645 | 0.91223391 | 4.91E-11 |
| TRIB3    | 57761  | 1.462237681 | 0.379967921 | 0.04633025 | 1.33530843 | 1.60123233 | 6.77E-11 |
| MOCS2    | 4338   | 0.799114381 | -0.22425119 | 0.02789709 | 0.75659402 | 0.84402438 | 7.16E-11 |
| AGFG2    | 3268   | 0.830330544 | -0.18593141 | 0.03107582 | 0.78126654 | 0.8824758  | 1.32E-10 |
| FLNA     | 2316   | 1.333201344 | 0.287583076 | 0.04358647 | 1.22403792 | 1.4521003  | 1.67E-10 |
| NUAK2    | 81788  | 0.979437217 | -0.02077714 | 0.04140376 | 0.90309545 | 1.06223242 | 2.01E-10 |
| FAF2     | 23197  | 0.915519433 | -0.08826369 | 0.01815191 | 0.8835205  | 0.94867728 | 1.17E-09 |
| ARHGAP29 | 9411   | 1.052772775 | 0.051427422 | 0.04692835 | 0.96026071 | 1.15419751 | 1.42E-09 |
| MARCKS   | 4082   | 1.246322358 | 0.220197101 | 0.03355461 | 1.16699407 | 1.33104311 | 2.43E-09 |
| CXorf56  | 63932  | 1.197974491 | 0.180632206 | 0.02263583 | 1.14598759 | 1.25231974 | 4.57E-09 |
| C8orf48  | 157773 | 0.808807779 | -0.21219399 | 0.05993774 | 0.71916115 | 0.90962925 | 5.22E-09 |
| SLIT2    | 9353   | 0.907046149 | -0.09756195 | 0.07325861 | 0.78572676 | 1.04709774 | 5.98E-09 |
| GLIS2    | 84662  | 1.09476084  | 0.090535929 | 0.04147712 | 1.00928512 | 1.18747545 | 6.15E-09 |
| TNS1     | 7145   | 0.858703724 | -0.15233132 | 0.04281859 | 0.78957992 | 0.93387898 | 8.49E-09 |
| RHOQ     | 23433  | 1.143764098 | 0.134324664 | 0.0279565  | 1.08277904 | 1.208184   | 1.35E-08 |
| ANKRD1   | 27063  | 1.146212487 | 0.136463018 | 0.08261426 | 0.97486337 | 1.34767918 | 1.67E-08 |
| AMOTL2   | 51421  | 1.074567893 | 0.071918621 | 0.03661467 | 1.00015521 | 1.15451697 | 3.15E-08 |
| EDN2     | 1907   | 1.157424463 | 0.146197246 | 0.07681303 | 0.99565595 | 1.34547621 | 3.92E-08 |
| PPP1R3B  | 79660  | 0.822554929 | -0.19534002 | 0.04045633 | 0.75985097 | 0.89043331 | 8.71E-08 |
| THBS1    | 7057   | 0.881475213 | -0.1261584  | 0.0544967  | 0.79217737 | 0.98083912 | 1.00E-07 |
| FAM167A  | 83648  | 0.981904901 | -0.01826082 | 0.06992941 | 0.85614122 | 1.12614276 | 1.06E-07 |
| LHFP     | 10186  | 0.80749185  | -0.21382232 | 0.04117605 | 0.74488466 | 0.87536114 | 3.54E-07 |
| NEB      | 4703   | 1.45891892  | 0.377695695 | 0.06933692 | 1.2735367  | 1.67128627 | 4.52E-07 |
| NRAS     | 4893   | 1.150687509 | 0.140359597 | 0.02752856 | 1.09024736 | 1.21447828 | 4.79E-07 |
| MAML2    | 84441  | 1.223727454 | 0.201901491 | 0.0471695  | 1.11566537 | 1.34225631 | 6.44E-07 |
| TSPAN3   | 10099  | 0.883693267 | -0.12364526 | 0.02761151 | 0.83714095 | 0.93283429 | 6.70E-07 |
| EDN1     | 1906   | 1.179250793 | 0.164879315 | 0.05902602 | 1.05042038 | 1.3238818  | 7.37E-07 |
| ITGB2    | 3689   | 1.175089064 | 0.161343944 | 0.05389096 | 1.05730118 | 1.30599903 | 1.11E-06 |
| FLOT1    | 10211  | 0.998454663 | -0.00154653 | 0.02516008 | 0.95041231 | 1.04892551 | 1.21E-06 |
| TGM2     | 7052   | 1.221716949 | 0.200257205 | 0.05337604 | 1.10036517 | 1.35645179 | 1.36E-06 |
| TEAD1    | 7003   | 0.948572046 | -0.05279754 | 0.03199995 | 0.89090606 | 1.00997059 | 1.41E-06 |
| GTPBP3   | 84705  | 1.193333929 | 0.176751011 | 0.02679268 | 1.13228569 | 1.25767364 | 1.85E-06 |
| SEC14L1  | 6397   | 1.066248312 | 0.064146237 | 0.0266572  | 1.01197016 | 1.12343773 | 1.93E-06 |
| SLC5A3   | 6526   | 1.148903042 | 0.13880761  | 0.03753393 | 1.0674178  | 1.23660876 | 1.95E-06 |
| AKR1C2   | 1646   | 1.255814814 | 0.227784616 | 0.10050855 | 1.03127044 | 1.52925051 | 2.00E-06 |
| DDAH1    | 23576  | 0.809916886 | -0.21082365 | 0.03804147 | 0.75172588 | 0.87261245 | 2.28E-06 |
| HEXB     | 3074   | 0.892295556 | -0.11395786 | 0.02437499 | 0.85066919 | 0.93595886 | 5.63E-06 |
| GAS6     | 2621   | 0.864550485 | -0.14554558 | 0.04520045 | 0.79125354 | 0.94463721 | 5.84E-06 |
| TGFB2    | 7042   | 1.148844124 | 0.138756327 | 0.06592214 | 1.00959707 | 1.30729661 | 1.79E-05 |
| MSRB3    | 253827 | 0.825609957 | -0.19163282 | 0.0524956  | 0.74488733 | 0.91508041 | 3.15E-05 |
| GADD45B  | 4616   | 0.827712529 | -0.18908937 | 0.04093408 | 0.76389977 | 0.89685592 | 3.45E-05 |
| TMEM49   | 81671  | 0.921936813 | -0.08127859 | 0.02793621 | 0.87281422 | 0.97382406 | 4.17E-05 |
| FAM35A   | 54537  | 0.919459876 | -0.08396887 | 0.02181562 | 0.88097441 | 0.95962659 | 4.52E-05 |
| ARHGEF10 | 9639   | 0.940921509 | -0.06089555 | 0.03708115 | 0.87496336 | 1.01185184 | 5.55E-05 |
| C8orf58  | 541565 | 0.892810688 | -0.11338072 | 0.026945   | 0.84688366 | 0.94122837 | 6.78E-05 |
| SH2D4A   | 63898  | 0.713913338 | -0.3369937  | 0.04787515 | 0.64997117 | 0.78414594 | 0.000178 |
| SAMSN1   | 64092  | 1.02352418  | 0.02325175  | 0.05352814 | 0.92158388 | 1.13674053 | 0.000258 |
| MDFIC    | 29969  | 0.977932235 | -0.0223149  | 0.03962498 | 0.90485692 | 1.05690903 | 0.000289 |
| EMP2     | 2013   | 0.893456417 | -0.11265772 | 0.04057818 | 0.82515049 | 0.96741671 | 0.000584 |
| MACF1    | 23499  | 0.953920312 | -0.04717514 | 0.03148541 | 0.89683318 | 1.01464128 | 0.00064  |
| SNX7     | 51375  | 1.052507141 | 0.051175071 | 0.03619679 | 0.98042481 | 1.12988908 | 0.000926 |
| CCDC8    | 83987  | 0.980581655 | -0.01960936 | 0.06667872 | 0.86045217 | 1.11748266 | 0.000955 |
| DAB2     | 1601   | 0.923451104 | -0.07963743 | 0.04286808 | 0.84903292 | 1.00439208 | 0.000989 |
| SFRS2IP  | 9169   | 0.919615549 | -0.08379958 | 0.02190473 | 0.88096968 | 0.95995671 | 0.00139  |
| GOLGA7   | 51125  | 1.03284246  | 0.032314672 | 0.02756697 | 0.97851849 | 1.09018231 | 0.001823 |
| CNIH     | 10175  | 0.964007279 | -0.03665643 | 0.02500586 | 0.91789983 | 1.01243077 | 0.001853 |
| SERTAD4  | 56256  | 1.161193494 | 0.14944835  | 0.06317691 | 1.025955   | 1.31425875 | 0.001855 |
| RAB40C   | 57799  | 0.913780073 | -0.09016536 | 0.02833216 | 0.86442099 | 0.96595759 | 0.001905 |

|                 |        |             |             |            |            |            |          |
|-----------------|--------|-------------|-------------|------------|------------|------------|----------|
| <i>SGK1</i>     | 6446   | 1.057896935 | 0.056282914 | 0.0441555  | 0.97019298 | 1.15352919 | 0.002076 |
| <i>ORC2L</i>    | 4999   | 1.005613556 | 0.005597859 | 0.020467   | 0.96607218 | 1.04677337 | 0.002361 |
| <i>SLC38A1</i>  | 81539  | 1.053941077 | 0.052536545 | 0.04140014 | 0.97179905 | 1.14302622 | 0.003289 |
| <i>SERPINE1</i> | 5054   | 1.067027143 | 0.06487641  | 0.06391258 | 0.94139736 | 1.20942226 | 0.003671 |
| <i>PTPMT1</i>   | 114971 | 0.94817686  | -0.05321423 | 0.02200488 | 0.90815246 | 0.98996523 | 0.004151 |
| <i>RFTN1</i>    | 23180  | 0.962520831 | -0.03819957 | 0.04038059 | 0.88927916 | 1.04179474 | 0.005328 |
| <i>AXL</i>      | 558    | 0.941354985 | -0.06043497 | 0.04288594 | 0.86546369 | 1.02390108 | 0.005535 |
| <i>ERRF1</i>    | 54206  | 1.062187922 | 0.060330858 | 0.04556523 | 0.97144041 | 1.16141265 | 0.006228 |
| <i>COX8A</i>    | 1351   | 1.089728221 | 0.085928327 | 0.02626111 | 1.03505803 | 1.14728601 | 0.00639  |
| <i>FGF2</i>     | 2247   | 0.827753134 | -0.18904032 | 0.05985238 | 0.73612979 | 0.9307805  | 0.00713  |
| <i>DUT</i>      | 1854   | 0.988714113 | -0.01135006 | 0.02434486 | 0.94264539 | 1.0370343  | 0.008411 |
| <i>MYLK</i>     | 4638   | 1.043757681 | 0.042827357 | 0.05129596 | 0.94392283 | 1.15415166 | 0.009906 |
| <i>F3</i>       | 2152   | 0.808345341 | -0.21276591 | 0.06478146 | 0.71195879 | 0.91778091 | 0.010827 |
| <i>CNP</i>      | 1267   | 0.999476605 | -0.00052353 | 0.02183194 | 0.95761128 | 1.04317222 | 0.015003 |
| <i>CDK14</i>    | 5218   | 0.903518815 | -0.10145834 | 0.04294601 | 0.83058004 | 0.98286283 | 0.016297 |
| <i>YAP1</i>     | 10413  | 1.074151146 | 0.071530718 | 0.0345597  | 1.00380216 | 1.14943037 | 0.027103 |
| <i>FSTL1</i>    | 11167  | 1.031786658 | 0.031291919 | 0.04585214 | 0.94310597 | 1.12880603 | 0.036856 |
| <i>KIAA1033</i> | 23325  | 0.958991192 | -0.04187339 | 0.02376679 | 0.91534389 | 1.00471977 | 0.053691 |
| <i>LLGL1</i>    | 3996   | 1.07518405  | 0.072491857 | 0.02716521 | 1.01943547 | 1.13398128 | 0.05473  |
| <i>DRAM2</i>    | 128338 | 0.964263149 | -0.03639105 | 0.02473698 | 0.91862744 | 1.01216596 | 0.063421 |
| <i>PDLIM2</i>   | 64236  | 0.937252649 | -0.0648024  | 0.03483205 | 0.8754021  | 1.00347318 | 0.079515 |
| <i>KLF6</i>     | 1316   | 0.976919217 | -0.02335132 | 0.03523937 | 0.91172287 | 1.04677769 | 0.110534 |
| <i>GLTSCR1</i>  | 29998  | 0.958004414 | -0.04290289 | 0.02555494 | 0.91120293 | 1.00720973 | 0.131301 |
| <i>BICC1</i>    | 80114  | 1.121220364 | 0.114417703 | 0.07207945 | 0.97350198 | 1.29135341 | 0.239443 |
| <i>FAM45A</i>   | 404636 | 0.986037408 | -0.01406099 | 0.02098648 | 0.9463018  | 1.02744154 | 0.243106 |
| <i>CCRN4L</i>   | 25819  | 1.096420042 | 0.092050365 | 0.03776258 | 1.01820072 | 1.18064826 | 0.273882 |
| <i>CAMK4</i>    | 814    | 0.953738647 | -0.0473656  | 0.05858306 | 0.8502828  | 1.06978221 | 0.320353 |
| <i>CYR61</i>    | 3491   | 1.044917475 | 0.043937911 | 0.05530632 | 0.93757316 | 1.16455182 | 0.348566 |
| <i>PFKFB3</i>   | 5209   | 0.960507091 | -0.04029391 | 0.0423034  | 0.88408059 | 1.04354046 | 0.368723 |
| <i>CTGF</i>     | 1490   | 1.021113128 | 0.020893334 | 0.05803639 | 0.91132481 | 1.14412777 | 0.449523 |
| <i>PRKACG</i>   | 5568   | 1.00382085  | 0.003813569 | 0.0128564  | 0.97884252 | 1.02943659 | 0.663378 |
| <i>ATP6V1A</i>  | 523    | 1.00433343  | 0.004324067 | 0.02194855 | 0.96204477 | 1.04848098 | 0.760478 |

---

**Table S4, Related to STAR methods. qPCR primer list**

| <b>Gene</b>   | <b>Forward</b>             | <b>Reverse</b>               |
|---------------|----------------------------|------------------------------|
| <i>Abhd4</i>  | 5'-AAGCTAGCTCTTCCCGATGC-3' | 5'-TCTCCTACCCATGCCTTGTC-3'   |
| <i>Actb</i>   | 5'-ATCCGCCGCCCGTCCACA-3'   | 5'-ACCATCACGCCCTGGTGCCT-3'   |
| <i>ACTB</i>   | 5'-ATCCGCCGCCCGTCCACA-3'   | 5'-ACCATCACGCCCTGGTGCCT-3'   |
| <i>Bax</i>    | 5'-TGAAGACAGGGGCCTTTTTG-3' | 5'-AATTCGCCGGAGACACTCG-3'    |
| <i>Cdkn1a</i> | 5'-CTAGGGGAATTGGAGTCAGG-3' | 5'-AGAGACAACGGCACACTTTG-3'   |
| <i>Crip2</i>  | 5'-GGCCAGGTCTGGGATTTC-3'   | 5'-TCATGGAGAAATACGTGTCACC-3' |
| <i>Phlda3</i> | 5'-GAGCGGTGGAACATGTAAGG-3' | 5'-TCGTGCGATGCTACTCTCTC-3'   |
| <i>Ptpn14</i> | 5'-AGCACTACTCGGAGACCCAT-3' | 5'-GAGAACGGCAGTACAAGGCT-3'   |
| <i>PTPN14</i> | 5'-CGACTTCTGGCAGATGGTGT-3' | 5'-GTGGCTTTTGGTTTCGTCCAC-3'  |
